# Supplementary material for: Absence of the intracellular lipolytic inhibitor G0S2 enhances intravascular triglyceride clearance and abolishes diet-induced hypertriglyceridemia
Source: JCI journal article supplement (doi:10.1172/jci181754), 2025-03-18

**Supplementary Figure 1. *G0s2*-AKO mice on chow diet show enhanced lipid tolerance, reduced ANGPTL4 expression and increased LPL production.** **A.** Plasma TG levels during the oral lipid tolerance test (OLTT) over time (n=7). **B.** iAUC analysis of plasma TG levels during the OLTT (n=7). **C.** Circulating lipase activity measured 10 min after PBS or heparin administration (n=7), as determined following a 60-min reaction of plasma with the artificial substrate. **D.** Plasma LPL protein concentration 10 min post-PBS or heparin administration (n=7). **E.** Western blot analysis of proteins in epididymal WAT after 4-h refeeding following an overnight fast. **F.** Relative mRNA expression in epididymal WAT after the 4-h refeeding (n=7) by qPCR. Data are presented as mean  $\pm$  SEM. Statistical significance was determined using unpaired two-tailed t-tests (**A&B**) or two-way ANOVA (**C, D&F**): \* $p < 0.05$ , \*\* $p < 0.01$ , \*\*\* $p < 0.001$ , \*\*\*\* $p < 0.0001$ .

**Supplementary Figure 2. Impact of WAT transplantation on body weight and compositions.** **A.** Plasma TG levels in chow-fed donor mice (WT, n=9; *G0s2*<sup>-/-</sup>, n=10) and WD-fed recipient mice (n=19) prior to transplantation. **B&C.** Total body weight (B) and body compositions (C) before and after transplantation (n=9-10). Data represent mean  $\pm$  SEM. \* $p < 0.05$ , \*\* $p < 0.01$ , \*\*\* $p < 0.001$ , \*\*\*\* $p < 0.0001$  by two-way ANOVA (**A, B&C**).

Figure S1

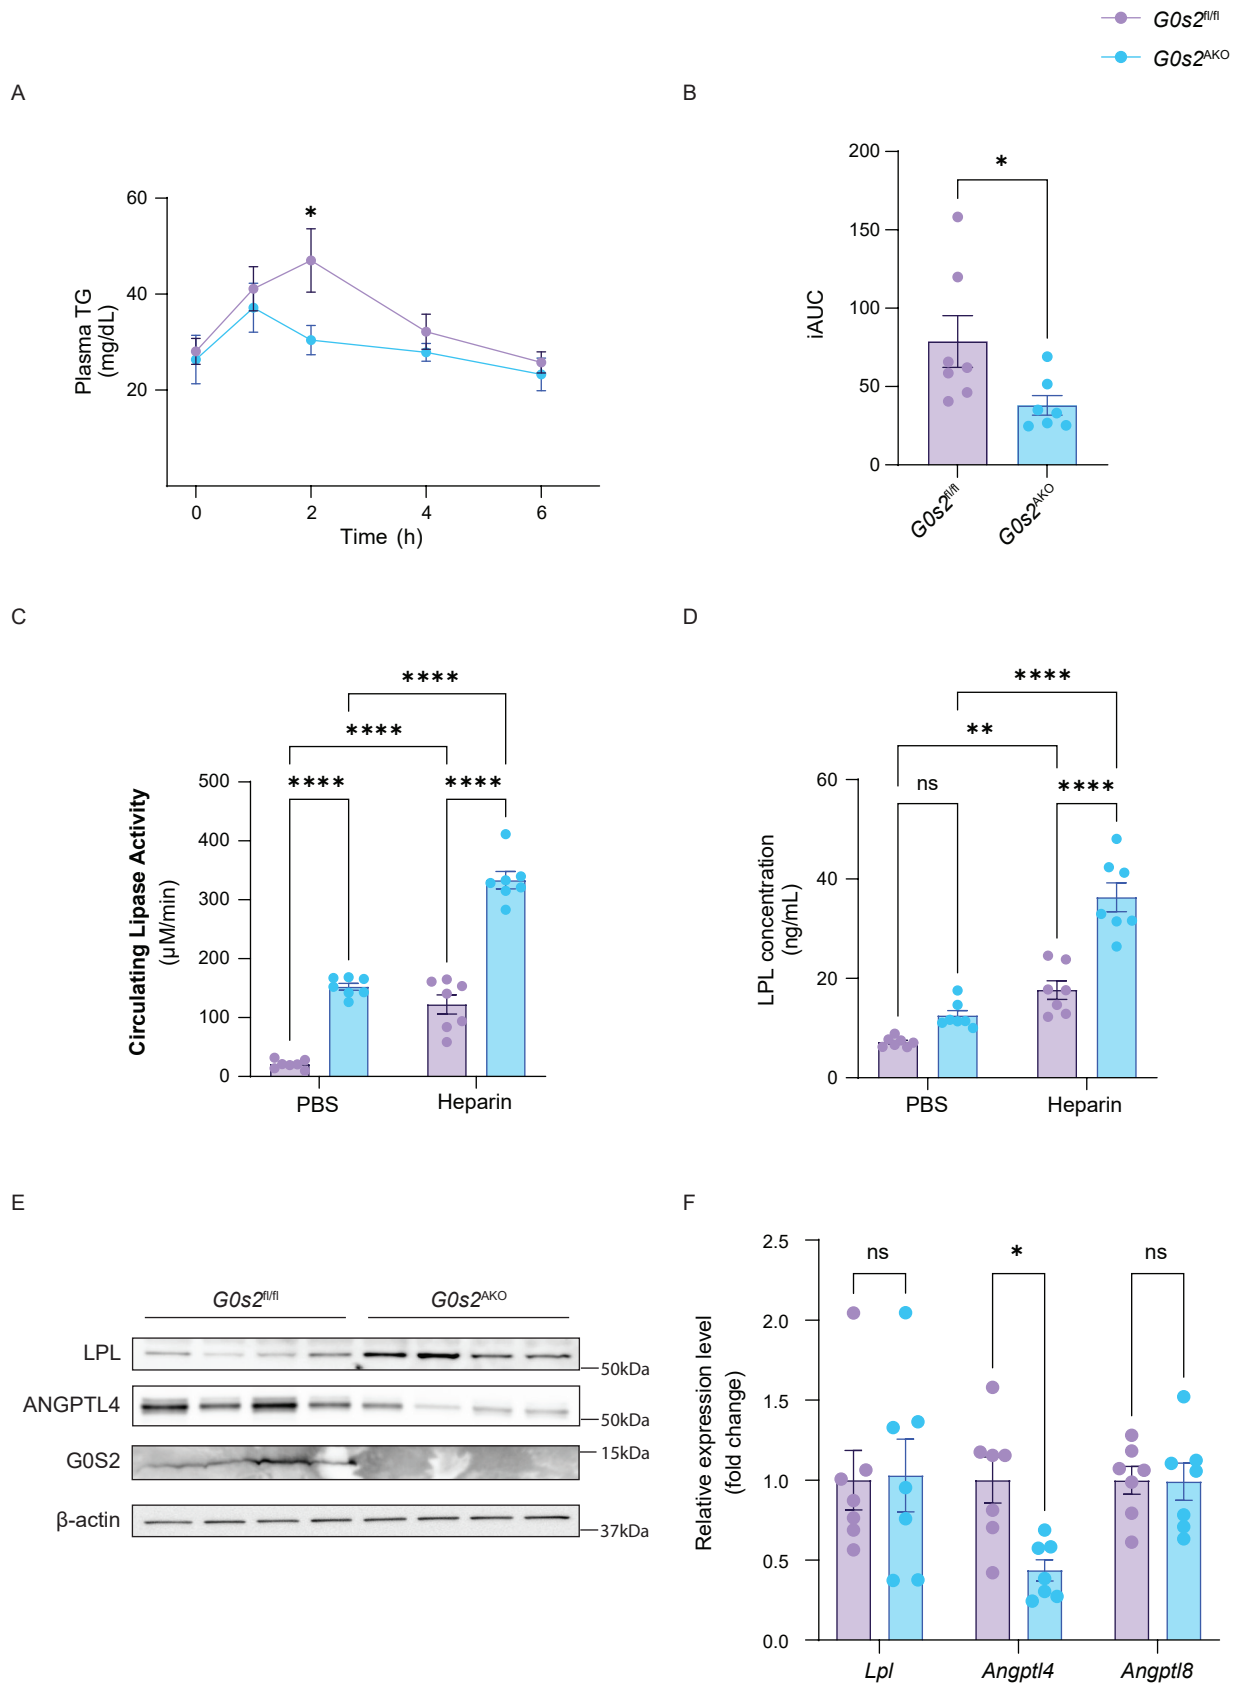

Figure S2

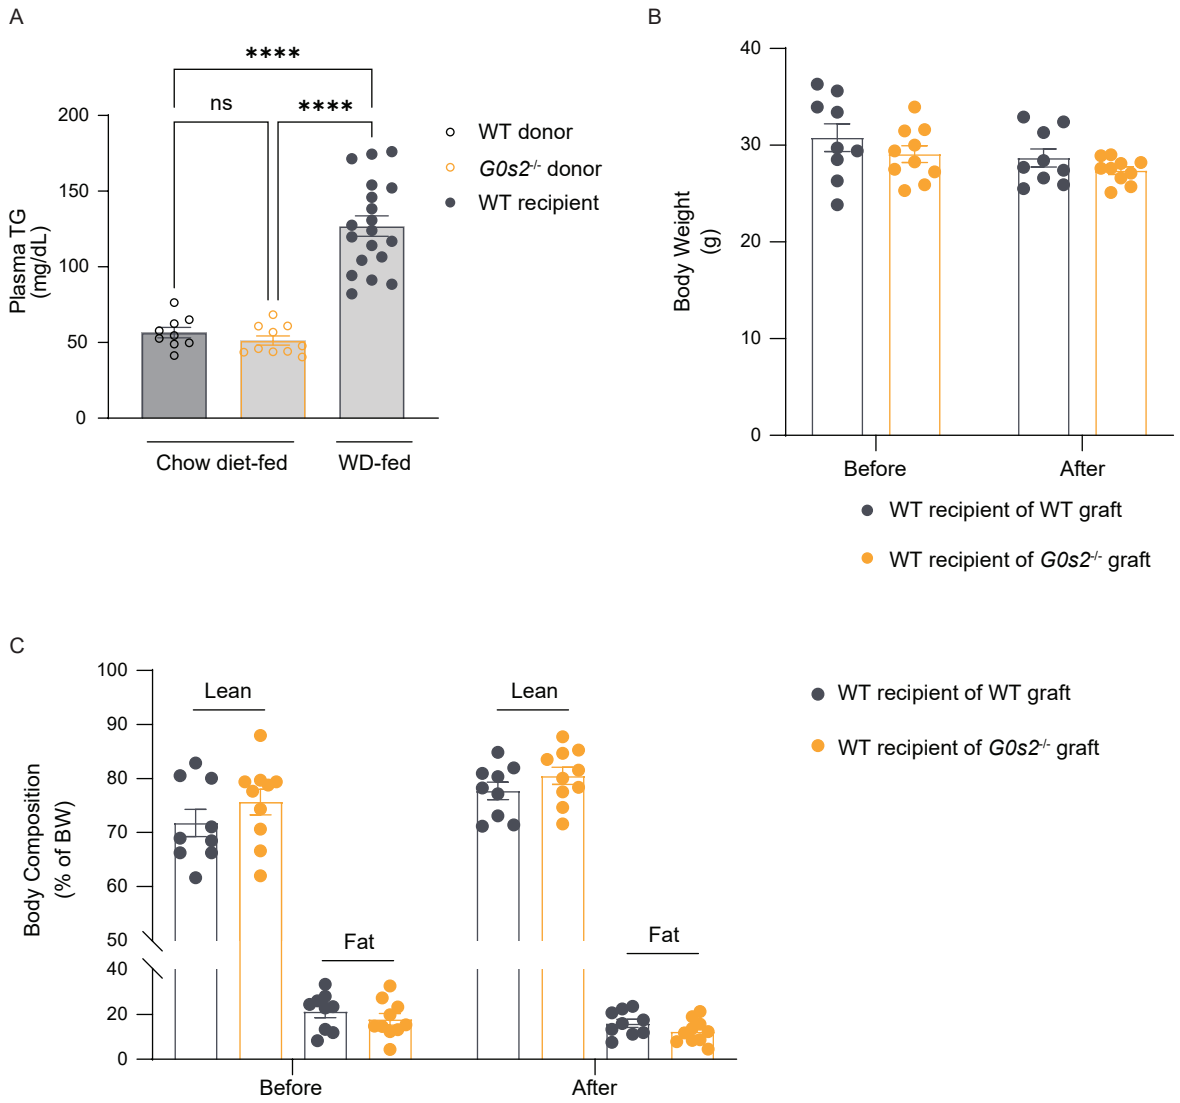

Supplement: sd2 [file 2]
